# Supplementary material
Source: PubMed Central journal article supplement (PMC3058992)
Supplement: supp_M110.164558_jbc.M110.164558-1.pdf [file supp_M110.164558_jbc.M110.164558-1.pdf]

Table S1.

| <b>Gene</b>      | <b>Forward primer</b> | <b>Reverse primer</b>  |
|------------------|-----------------------|------------------------|
| Mouse Per3       | gtgacagcagagtcccatga  | cactgccatctcgagttcaa   |
| Human PER3       | tctggcgtcttctcacttt   | tcataccgtgcagctcttg    |
| Cry1             | gggacagccagctgatgat   | catctcgttccttcccaaaa   |
| Rev-ERB $\alpha$ | agccaccccaagaccttact  | cggtcattcaaaactggacct  |
| aP2              | cagaagtgggatggaaagtcg | cgactgactattgtagtgttga |
| Ppar $\gamma$    | ccagagcatggccttcgct   | cagcaaccattgggtcagctc  |
| Hprt             | aaacaatgcaaactgctttcc | ggtcctttcaccagcaagct   |
| Gapdh            | cttcaccaccttcttgatgc  | ccaaaagggcatcatctctg   |
| Lamb3            | gagcagggccagaagccgagc | gcttctgcagagccacggt    |

**Primer sequences used for quantitative RT-PCR.**
